# Supplementary material
Source: publisher figshare collection journal article supplement (https://plos.figshare.com/articles/dataset/_/8861411)
Supplement: Supplementary file 1 [file 1]

Archive with 6 entries (6 files):
- pone.0219600.s001.doc
- pone.0219600.s002.doc
- pone.0219600.s003.docx
- pone.0219600.s004.docx
- pone.0219600.s005.pdf
- pone.0219600.s006.docx
